# Supplementary material for: Electric field-induced nanopatterning of reduced graphene oxide on Si and a p–n diode junction
Source: Royal Society of Chemistry journal article supplement (doi:10.1039/c0jm03939j), 2011-01-01
Supplement: c0jm03939j.pdf [file c0jm03939j.pdf]

## Supporting Information

### Electric Field-induced Nanopatterning of Reduced Graphene Oxide on Si and a p-n Diode Junction

Sohyeon Seo, Changhua Jin, Young Rae Jang, Junghyun Lee, Seong Kyu Kim *and* Hyoyoung Lee

#### Supporting Figures

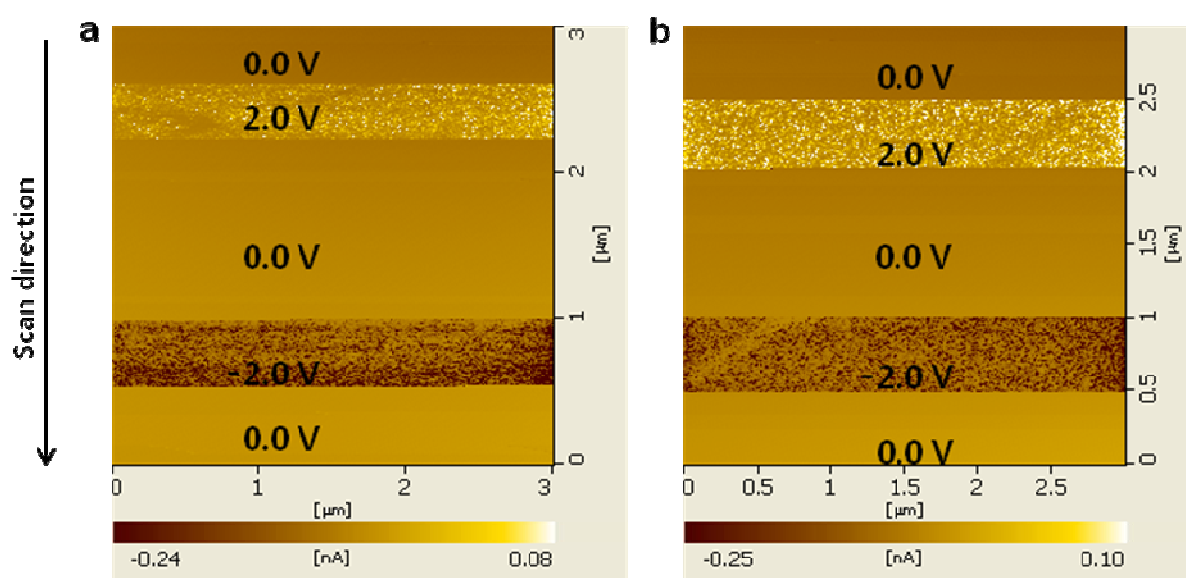

**Fig. S1.** (a), (b) Current images according to applied voltage to n- and p-doping Si substrates, respectively.

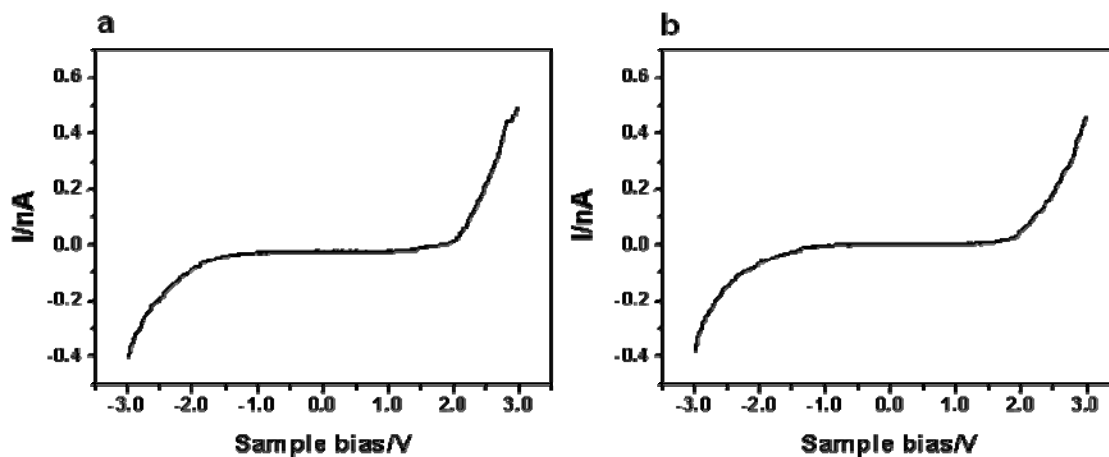

**Fig. S2.** Current-voltage ( $I$ - $V$ ) characteristics of (a) n-doping Si and (b) p-doping Si substrates: Au-coated AFM tip was used.

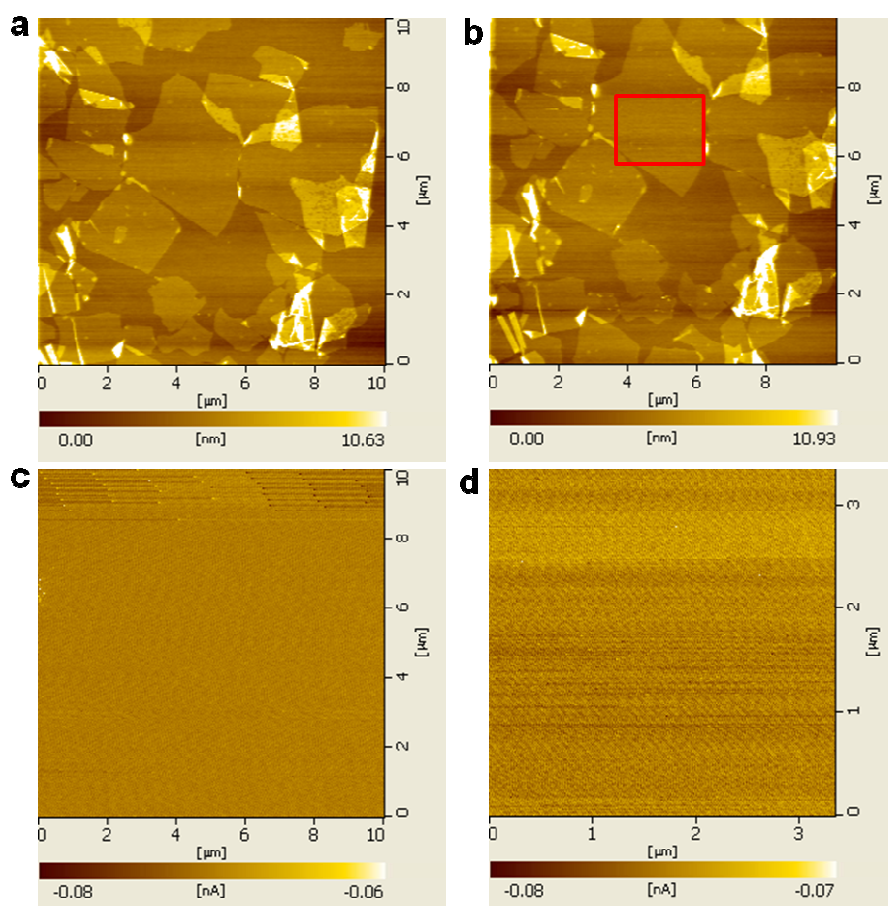

**Fig. S3.** EFI nanolithography at 35% RH: topographical AFM images (a) before and (b) after the EFI nanolithography at  $-5.0 V_{sub}$  on an n-doping Si substrate. The EFI nanolithographic area is marked by a red rectangle in (b). (c) and (d) Corresponding current images at  $1.0 V_{sub}$  for (a) and (b), respectively.

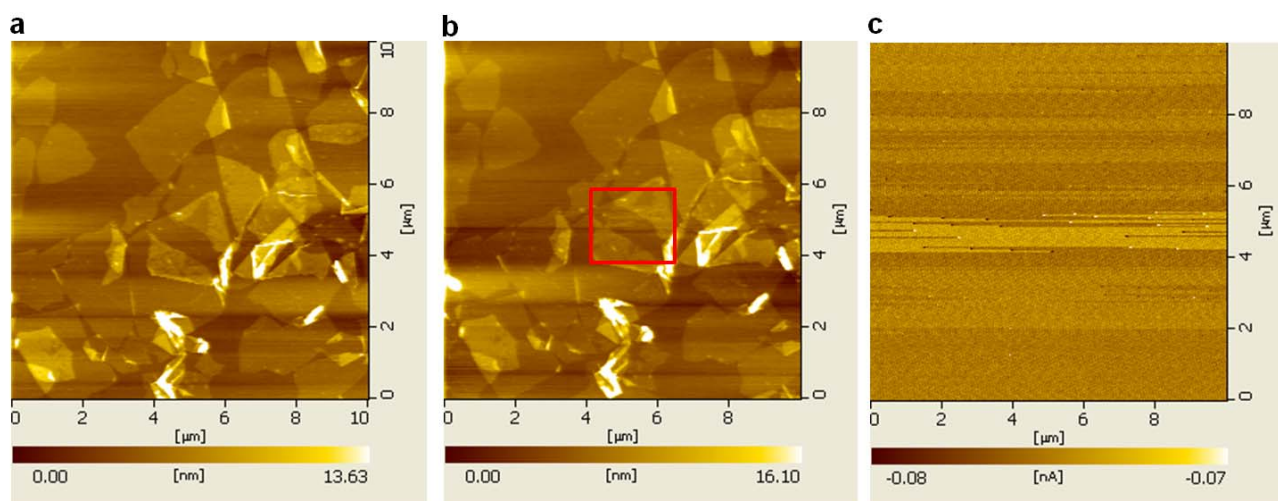

**Fig. S4.** Topographical AFM images (a) before and (b) after the EFI nanolithography at  $-10.0 V_{\text{sub}}$  on a p-doping Si substrate. The EFI nanolithographic area is marked by a red rectangle in (b). (c) Corresponding current image for (b) at  $1.0 V_{\text{sub}}$ .

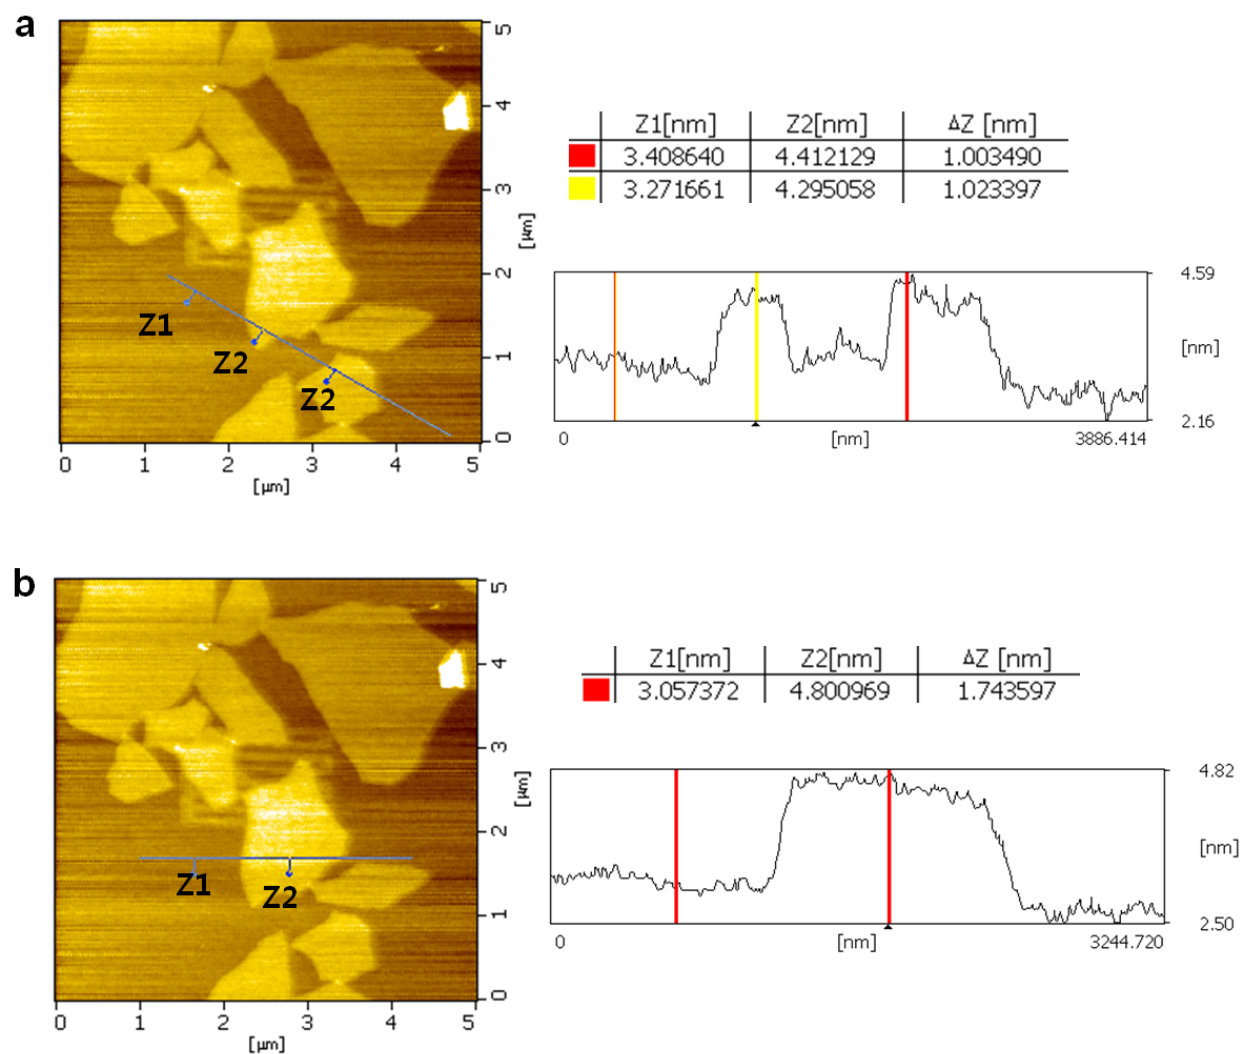

**Fig. S5.** Cross-sectional analysis for topographical AFM image of GO on p-doping Si after the EFI lithography at 5.0  $V_{\text{sub}}$ . (a) Z2 (red) and Z2 (yellow) indicate rGO/Si and GO/Si, respectively. (B) Z2 indicates rGO/SiO<sub>x</sub>.

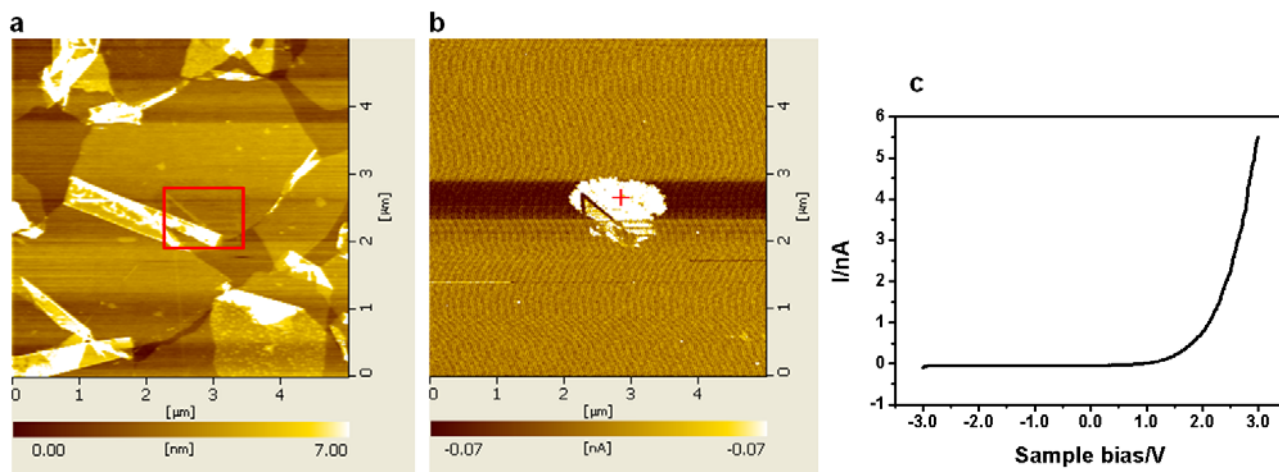

**Fig. S6.** (a) Topographical AFM image and (b) corresponding current image after the EFI nanolithography at 5.0  $V_{\text{sub}}$  on an n-doping Si substrate. The EFI nanolithographic area is marked by a red rectangle in (a). Current image was taken at 1.0  $V_{\text{sub}}$ . (c) Current-voltage ( $I$ - $V$ ) characteristics of a point (+) in (b): Au-coated AFM tip was used.

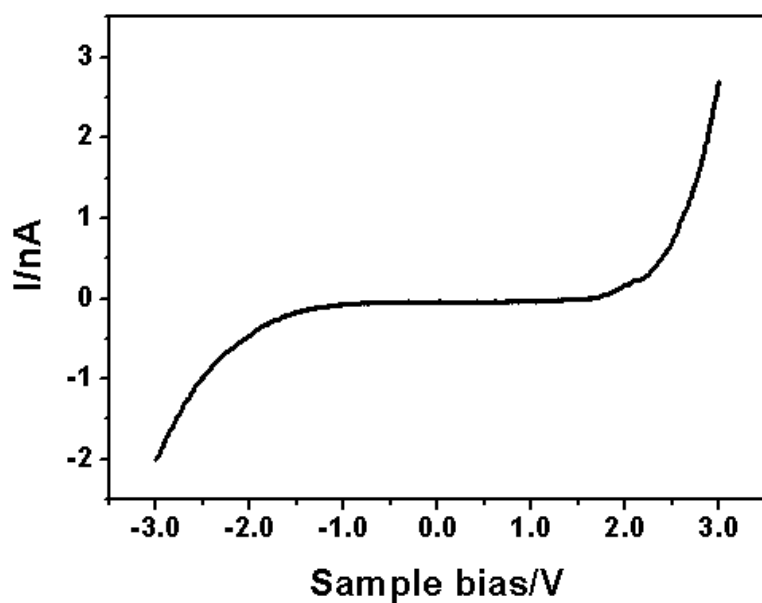

**Fig. S7.** Current-voltage ( $I$ - $V$ ) characteristics of rGO/p-doping Si (Fig. 4b): Au-coated AFM tip was used.
